# Supplementary material for: Preparation and characterization of a new cement-based composite with sulfur polymer
Source: Royal Society of Chemistry journal article supplement (doi:10.1039/c5ra02281a), 2015-01-01
Supplement: c5ra02281a1.pdf [file c5ra02281a1.pdf]

## Electronic Supplementary Information

### Preparation and characterization of new cement-based composite with sulphur polymer

5 Seunggun Yu,<sup>\*a,‡</sup> Hyuk Kwon,<sup>b,c,‡</sup> Hyuk Rae Noh,<sup>b</sup> Bo-In Park,<sup>b</sup> No Kyung Park,<sup>b</sup> Heon-Jin Choi,<sup>a</sup> Sung-Churl Choi<sup>c</sup> and Goo Dae Kim<sup>\*b</sup>

<sup>a</sup> Department of Materials Science and Engineering, Yonsei University, Seoul, 120-749, Republic of Korea. E-mail: kist@yonsei.ac.kr

<sup>b</sup> Interface Control Research Center, Korea Institute of Science and Technology, Hwarangro 14-gil 5, Seongbuk-gu, Seoul 136-791, Republic of Korea.

10 <sup>c</sup> Division of Materials Science and Engineering, Hanyang University, 222 Wangsimni-ro, Seongdong-gu, Seoul 133-791, Republic of Korea

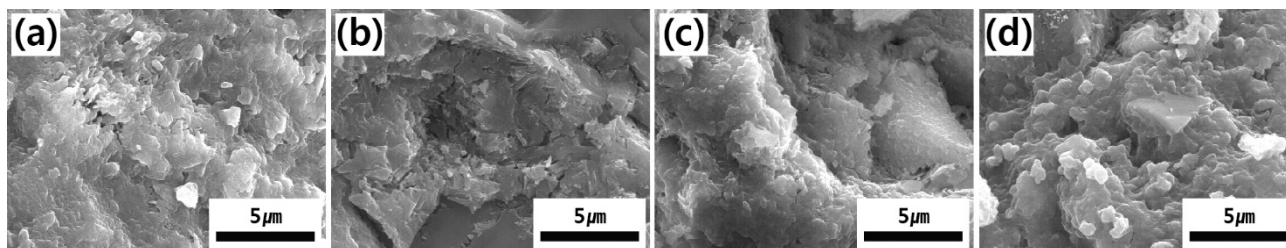

Fig. S1. SEM images of (a) PCM, (b) SPM5, (c) SPM10 and (d) SPM20 cured for 7 days, respectively.

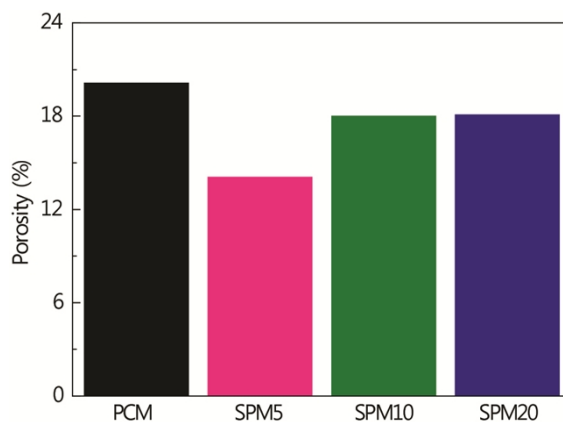

20 Fig. S2. Total porosity of PCM, SPM5, SPM10 and SPM20 cured for 28 days.

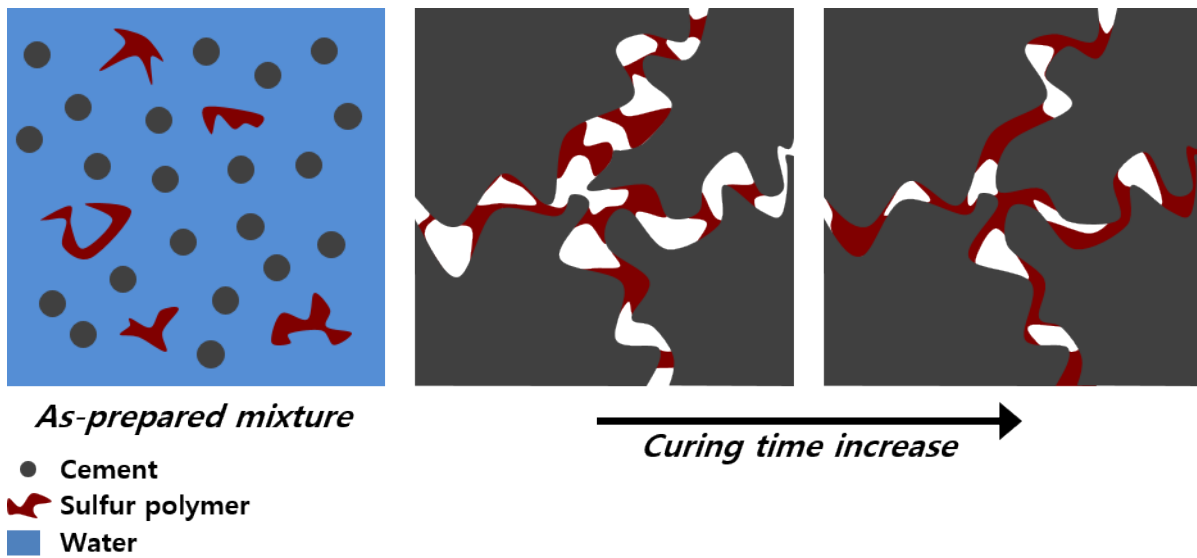

Fig. S3. Schematic illustration of the formation of sulfur polymer films in hardened cement with curing time. The incorporated sulfur polymer film gradually filled in pore between hydrates.

**Table S1.** Composition of dicyclopentadiene

| Composition (%) |       |                        |                       |       |
|-----------------|-------|------------------------|-----------------------|-------|
| Oligomer        | Dimer | Aliphatic hydrocarbons | Aromatic hydrocarbons | Water |
| 81.50           | 13.30 | 4.84                   | 0.34                  | 0.02  |

**Table S2.** Chemical composition of Portland cement

| Chemical composition (%) |                                |                                |      |     |                 |                   |                  |     |       |
|--------------------------|--------------------------------|--------------------------------|------|-----|-----------------|-------------------|------------------|-----|-------|
| SiO <sub>2</sub>         | Al <sub>2</sub> O <sub>3</sub> | Fe <sub>2</sub> O <sub>3</sub> | CaO  | MgO | SO <sub>3</sub> | Na <sub>2</sub> O | K <sub>2</sub> O | LOI | F-CaO |
| 20.6                     | 6.1                            | 3.1                            | 62.4 | 2.3 | 2.0             | 0.14              | 0.88             | 1.9 | 1.4   |

5

**Table S3.** Physical properties of Portland cement

| Specific gravity (g/cm <sup>3</sup> ) | Stability (mm) | Setting time (min) |       | Compressive strength (MPa) |        |         |
|---------------------------------------|----------------|--------------------|-------|----------------------------|--------|---------|
|                                       |                | Initial            | Final | 3 days                     | 7 days | 28 days |
| 3.15                                  | 0.04           | 220                | 310   | 24.5                       | 30.2   | 40.3    |

10

**Table S4.** Sample notation and experimental variables

| Sample notation | W/C <sup>a)</sup> | P/C <sup>b)</sup> | A/C <sup>c)</sup> | Mixing time (min) | Mixing temperature (°C) |
|-----------------|-------------------|-------------------|-------------------|-------------------|-------------------------|
| PCM             | 0.50              | 0.00              | 2.45              | 5                 | 25                      |
| SPM5            | 0.50              | 0.05              | 2.45              | 5                 | 55                      |
| SPM10           | 0.50              | 0.10              | 2.45              | 5                 | 55                      |
| SPM20           | 0.50              | 0.20              | 2.45              | 5                 | 55                      |

<sup>a)</sup>W/C : Water to cement ratio<sup>b)</sup>P/C : Polymer to cement ratio<sup>c)</sup>A/C : Aggregation to cement ratio

15

**Table S5.** The content of dehydrated calcium hydroxide of PCM and SPMs cured for 28 days

| Type                         | Samples | Ca(OH) <sub>2</sub> (% of ignited mass) |
|------------------------------|---------|-----------------------------------------|
| Plain cement mortar          | PCM     | 14.42                                   |
| Sulfur polymer-cement mortar | SPM5    | 13.48                                   |
|                              | SPM10   | 12.15                                   |
|                              | SPM20   | 10.08                                   |
